# Supplementary material for: Imido titanium compounds bearing the 6-dimethylamino-1,4,6-trimethyl-1,4-diazacycloheptane ligand: synthesis, structures, solution dynamics and ethylene polymerisation capability
Source: Royal Society of Chemistry journal article supplement (doi:10.1039/b802027b), 2008-01-01
Supplement: b802027b.pdf [file b802027b.pdf]

# Imido titanium compounds bearing the 6-dimethylamino-1,4,6-trimethyl-1,4-diazacycloheptane ligand: synthesis, structures, solution dynamics and ethylene polymerisation capability

Gregory J. Hayday, Chao Wang, Nicholas H. Rees and Philip Mountford\*

---

## Supporting information

---

Figure S1.  $^1\text{H}$  NMR spectrum of  $\text{Ti}(\text{N}-2,6\text{-C}_6\text{H}_3^i\text{Pr}_2)(\text{Me}_4\text{DACH})\text{Cl}_2$  (**3**) at 243K.

Figures S2 and S3. Plots of molecular weight distributions determined by GPC for the polyethylenes produced by  $\text{Ti}(\text{NR})(\text{Me}_4\text{DACH})\text{Cl}_2$  ( $\text{R} = ^t\text{Bu}$  (**1**), 2,6- $\text{C}_6\text{H}_3^i\text{Pr}_2$  (**3**), 2- $\text{C}_6\text{H}_4^t\text{Bu}$  (**4**) and 2- $\text{C}_6\text{H}_4\text{CF}_3$  (**5**)).

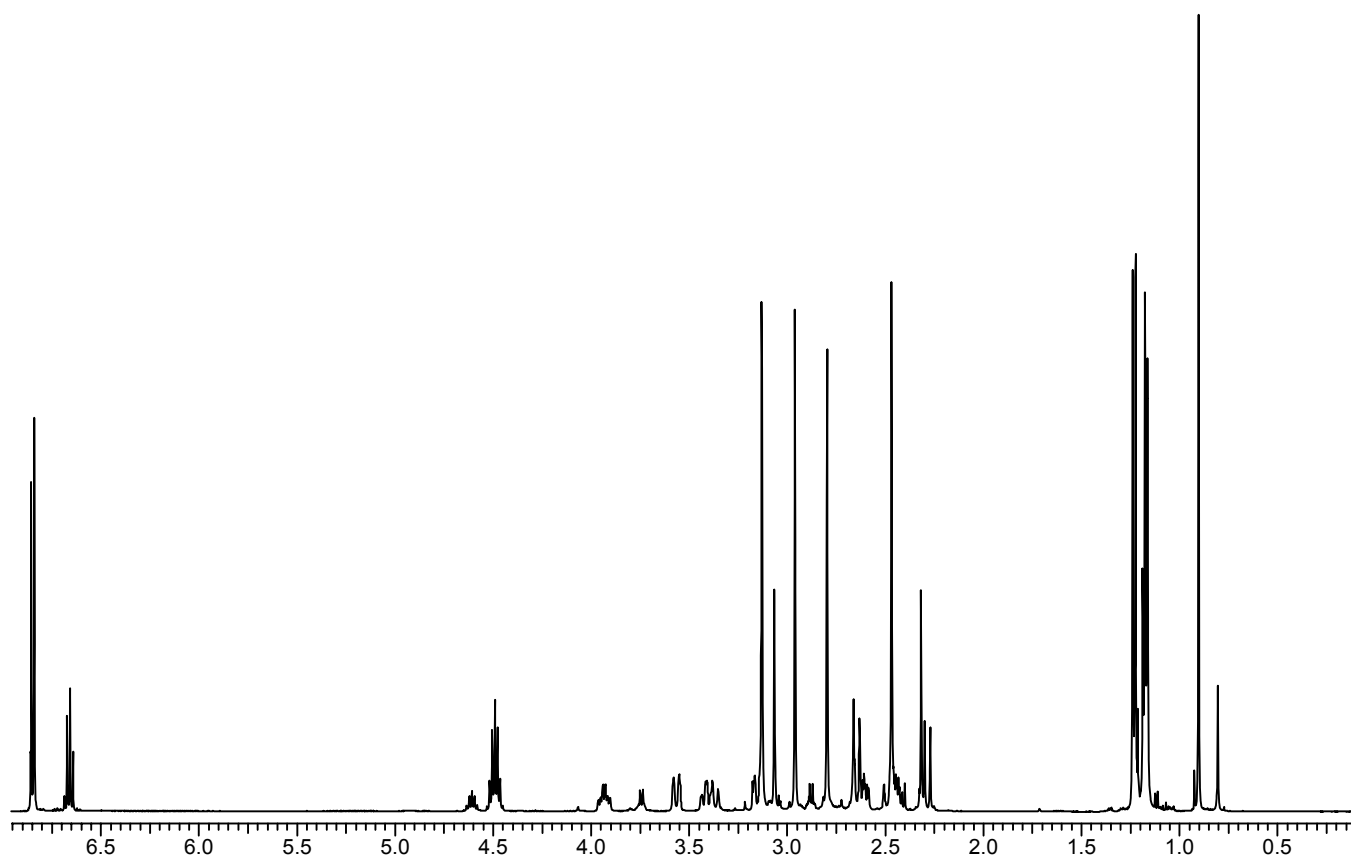

**Figure S1.** The  $^1\text{H}$  NMR spectrum of  $\text{Ti}(\text{N-2,6-C}_6\text{H}_3^i\text{Pr}_2)_2\text{Cl}_2(\text{Me}_4\text{DACH})$  (**3**) (499.9 MHz,  $\text{CD}_2\text{Cl}_2$ , 243 K).

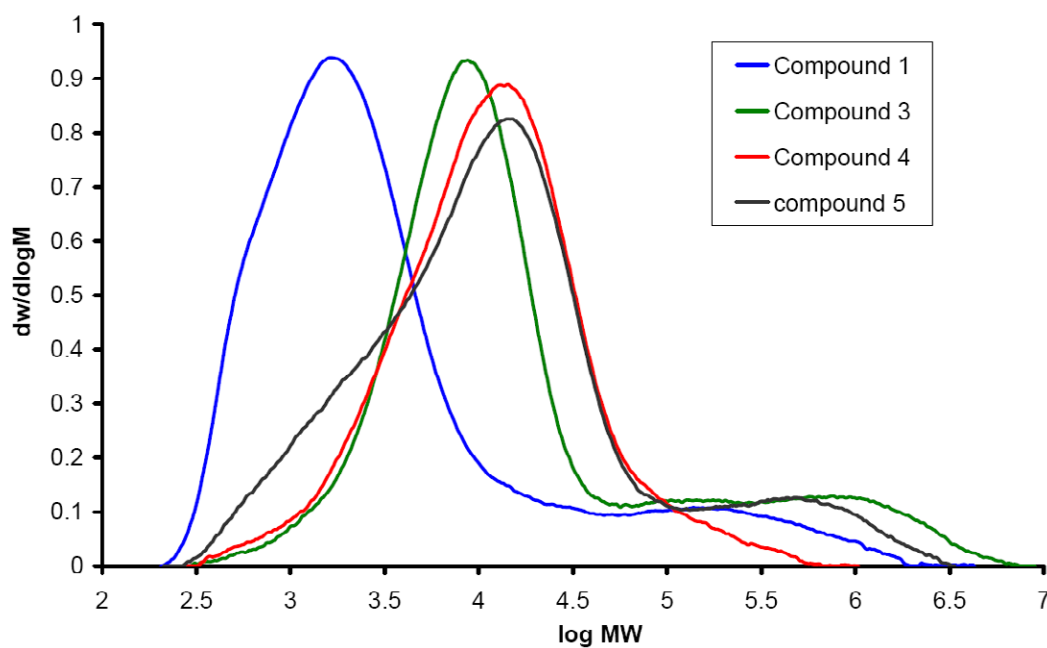

**Figure S2.** Plots of molecular weight distributions determined by GPC for the polyethylenes produced by **1**, **3**, **4** and **5** using solution (as-supplied) MAO.

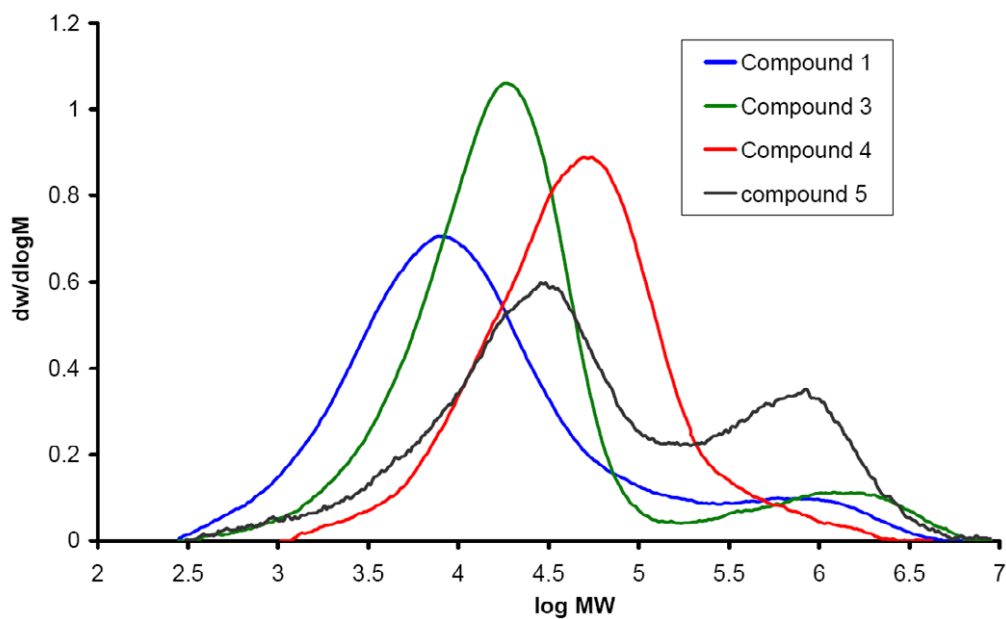

**Figure S3.** Plots of molecular weight distributions determined by GPC for the polyethylenes produced by **1**, **3**, **4** and **5** using dried MAO.
